# Supplementary material for: Comparison of Pharmacological Treatment Effects on Long-Time Outcomes in Heart Failure With Preserved Ejection Fraction: A Network Meta-analysis of Randomized Controlled Trials
Source: PubMed Central journal article supplement (PMC8652335; doi:10.3389/fphar.2021.707777), 2021-11-24
Supplement: DataSheet3.pdf [file DataSheet3.pdf]

# Confidence In Network Meta Analysis - CINeMA 2.0.0

## Incoherence

Define clinically important size of effect: Odds ratio

Relative effect estimates below **1.000** and above **1.000** are considered clinically important.

Importance of Incoherence depends on the variability of direct and indirect effects in relation to a clinically important size of effect

Global test based on a random-effects design-by-treatment interaction model

$\chi^2$  statistic: 1.912 (2 degrees of freedom), P value: 0.384

Local tests: Separating indirect from direct evidence

| Comparison                    | ACEI:ARB            |
|-------------------------------|---------------------|
| <b>Evidence: mixed</b>        |                     |
| NMA odds ratio:               | 0.831(0.433,1.594)  |
| Direct odds ratio:            | 0.443(0.018,11.167) |
| Indirect odds ratio:          | 0.853(0.439,1.659)  |
| <b>Inconsistency measures</b> |                     |
| Ratio of odds ratios:         | 0.519(0.019,14.009) |
| P value:                      | 0.697               |
| Incoherence judgment          | No concerns ▼       |

| Comparison                    | ACEI:Placebo                 |
|-------------------------------|------------------------------|
| <b>Evidence: mixed</b>        |                              |
| NMA odds ratio:               | 0.845(0.448,1.595)           |
| Direct odds ratio:            | 0.835(0.442,1.577)           |
| Indirect odds ratio:          | 407.198(0.000,834213564.430) |
| <b>Inconsistency measures</b> |                              |
| Ratio of odds ratios:         | 0.002(0.000,4261.174)        |
| P value:                      | 0.404                        |
| Incoherence judgment          | No concerns ▼                |

| Comparison                                    | ARB:ARNI           |
|-----------------------------------------------|--------------------|
| <b>Evidence: direct</b>                       |                    |
| Direct odds ratio:                            | 1.036(0.882,1.217) |
| <b>Inconsistency measures: Not applicable</b> |                    |
| Incoherence judgment                          | No concerns ▼      |

**Comparison** ARB:Placebo  
**Evidence: direct**  
 Direct odds ratio: 1.016(0.876,1.179)  
**Inconsistency measures:** Not applicable  
 Incoherence judgment  ▼

**Comparison** Beta blockers:Placebo  
**Evidence: direct**  
 Direct odds ratio: 0.588(0.363,0.953)  
**Inconsistency measures:** Not applicable  
 Incoherence judgment  ▼

**Comparison** Digoxin:Placebo  
**Evidence: direct**  
 Direct odds ratio: 0.999(0.744,1.342)  
**Inconsistency measures:** Not applicable  
 Incoherence judgment  ▼

**Comparison** MRA:Placebo  
**Evidence: direct**  
 Direct odds ratio: 0.910(0.756,1.096)  
**Inconsistency measures:** Not applicable  
 Incoherence judgment  ▼

**Comparison** Placebo:Sildenafil  
**Evidence: direct**  
 Direct odds ratio: 0.153(0.008,2.989)  
**Inconsistency measures:** Not applicable  
 Incoherence judgment  ▼

**Comparison** Placebo:Vericiguat 10mg  
**Evidence: direct**  
 Direct odds ratio: 0.452(0.181,1.127)  
**Inconsistency measures:** Not applicable  
 Incoherence judgment  ▼

**Comparison** Placebo:Vericiguat 15mg  
**Evidence: direct**  
 Direct odds ratio: 0.697(0.261,1.860)  
**Inconsistency measures:** Not applicable  
 Incoherence judgment  ▼

**Comparison** Vericiguat 10mg:Vericiguat 15mg  
**Evidence: direct**  
 Direct odds ratio: 1.542(0.680,3.499)  
**Inconsistency measures:** Not applicable  
 Incoherence judgment  ▼

|                                |                      |
|--------------------------------|----------------------|
| <b>Comparison</b>              | ACEI:ARNI            |
| <b>Evidence: indirect</b>      |                      |
| Indirect odds ratio:           | 0.861(0.440,1.684)   |
| <b>Inconsistency measures:</b> | Not applicable       |
| Incoherence judgment           | No concerns ▼        |
| <b>Comparison</b>              | ACEI:Beta blockers   |
| <b>Evidence: indirect</b>      |                      |
| Indirect odds ratio:           | 1.437(0.647,3.193)   |
| <b>Inconsistency measures:</b> | Not applicable       |
| Incoherence judgment           | No concerns ▼        |
| <b>Comparison</b>              | ACEI:Digoxin         |
| <b>Evidence: indirect</b>      |                      |
| Indirect odds ratio:           | 0.846(0.420,1.703)   |
| <b>Inconsistency measures:</b> | Not applicable       |
| Incoherence judgment           | No concerns ▼        |
| <b>Comparison</b>              | ACEI:MRA             |
| <b>Evidence: indirect</b>      |                      |
| Indirect odds ratio:           | 0.929(0.479,1.799)   |
| <b>Inconsistency measures:</b> | Not applicable       |
| Incoherence judgment           | No concerns ▼        |
| <b>Comparison</b>              | ACEI:Sildenafil      |
| <b>Evidence: indirect</b>      |                      |
| Indirect odds ratio:           | 0.129(0.006,2.701)   |
| <b>Inconsistency measures:</b> | Not applicable       |
| Incoherence judgment           | No concerns ▼        |
| <b>Comparison</b>              | ACEI:Vericiguat 10mg |
| <b>Evidence: indirect</b>      |                      |
| Indirect odds ratio:           | 0.382(0.126,1.163)   |
| <b>Inconsistency measures:</b> | Not applicable       |
| Incoherence judgment           | No concerns ▼        |
| <b>Comparison</b>              | ACEI:Vericiguat 15mg |
| <b>Evidence: indirect</b>      |                      |
| Indirect odds ratio:           | 0.589(0.183,1.897)   |
| <b>Inconsistency measures:</b> | Not applicable       |
| Incoherence judgment           | No concerns ▼        |
| <b>Comparison</b>              | ARB:Beta blockers    |
| <b>Evidence: indirect</b>      |                      |
| Indirect odds ratio:           | 1.731(1.044,2.869)   |
| <b>Inconsistency measures:</b> | Not applicable       |
| Incoherence judgment           | No concerns ▼        |

|                                |                    |
|--------------------------------|--------------------|
| <b>Comparison</b>              | ARB:Digoxin        |
| <b>Evidence: indirect</b>      |                    |
| Indirect odds ratio:           | 1.018(0.732,1.416) |
| <b>Inconsistency measures:</b> | Not applicable     |
| Incoherence judgment           | No concerns ▼      |

|                                |                    |
|--------------------------------|--------------------|
| <b>Comparison</b>              | ARB:MRA            |
| <b>Evidence: indirect</b>      |                    |
| Indirect odds ratio:           | 1.118(0.882,1.418) |
| <b>Inconsistency measures:</b> | Not applicable     |
| Incoherence judgment           | No concerns ▼      |

|                                |                    |
|--------------------------------|--------------------|
| <b>Comparison</b>              | ARB:Sildenafil     |
| <b>Evidence: indirect</b>      |                    |
| Indirect odds ratio:           | 0.155(0.008,3.052) |
| <b>Inconsistency measures:</b> | Not applicable     |
| Incoherence judgment           | No concerns ▼      |

|                                |                     |
|--------------------------------|---------------------|
| <b>Comparison</b>              | ARB:Vericiguat 10mg |
| <b>Evidence: indirect</b>      |                     |
| Indirect odds ratio:           | 0.460(0.182,1.161)  |
| <b>Inconsistency measures:</b> | Not applicable      |
| Incoherence judgment           | No concerns ▼       |

|                                |                     |
|--------------------------------|---------------------|
| <b>Comparison</b>              | ARB:Vericiguat 15mg |
| <b>Evidence: indirect</b>      |                     |
| Indirect odds ratio:           | 0.709(0.263,1.914)  |
| <b>Inconsistency measures:</b> | Not applicable      |
| Incoherence judgment           | No concerns ▼       |

|                                |                    |
|--------------------------------|--------------------|
| <b>Comparison</b>              | ARNI:Beta blockers |
| <b>Evidence: indirect</b>      |                    |
| Indirect odds ratio:           | 1.670(0.983,2.840) |
| <b>Inconsistency measures:</b> | Not applicable     |
| Incoherence judgment           | No concerns ▼      |

|                                |                    |
|--------------------------------|--------------------|
| <b>Comparison</b>              | ARNI:Digoxin       |
| <b>Evidence: indirect</b>      |                    |
| Indirect odds ratio:           | 0.983(0.681,1.419) |
| <b>Inconsistency measures:</b> | Not applicable     |
| Incoherence judgment           | No concerns ▼      |

|                                |                    |
|--------------------------------|--------------------|
| <b>Comparison</b>              | ARNI:MRA           |
| <b>Evidence: indirect</b>      |                    |
| Indirect odds ratio:           | 1.079(0.810,1.438) |
| <b>Inconsistency measures:</b> | Not applicable     |
| Incoherence judgment           | No concerns ▼      |

|                                |                                      |
|--------------------------------|--------------------------------------|
| <b>Comparison</b>              | <b>ARNI:Placebo</b>                  |
| <b>Evidence: indirect</b>      |                                      |
| Indirect odds ratio:           | 0.982(0.789,1.223)                   |
| <b>Inconsistency measures:</b> | Not applicable                       |
| Incoherence judgment           | No concerns ▼                        |
| <b>Comparison</b>              | <b>ARNI:Sildenafil</b>               |
| <b>Evidence: indirect</b>      |                                      |
| Indirect odds ratio:           | 0.150(0.008,2.959)                   |
| <b>Inconsistency measures:</b> | Not applicable                       |
| Incoherence judgment           | No concerns ▼                        |
| <b>Comparison</b>              | <b>ARNI:Vericiguat 10mg</b>          |
| <b>Evidence: indirect</b>      |                                      |
| Indirect odds ratio:           | 0.444(0.173,1.136)                   |
| <b>Inconsistency measures:</b> | Not applicable                       |
| Incoherence judgment           | No concerns ▼                        |
| <b>Comparison</b>              | <b>ARNI:Vericiguat 15mg</b>          |
| <b>Evidence: indirect</b>      |                                      |
| Indirect odds ratio:           | 0.685(0.251,1.872)                   |
| <b>Inconsistency measures:</b> | Not applicable                       |
| Incoherence judgment           | No concerns ▼                        |
| <b>Comparison</b>              | <b>Beta blockers:Digoxin</b>         |
| <b>Evidence: indirect</b>      |                                      |
| Indirect odds ratio:           | 0.588(0.334,1.036)                   |
| <b>Inconsistency measures:</b> | Not applicable                       |
| Incoherence judgment           | No concerns ▼                        |
| <b>Comparison</b>              | <b>Beta blockers:MRA</b>             |
| <b>Evidence: indirect</b>      |                                      |
| Indirect odds ratio:           | 0.646(0.385,1.084)                   |
| <b>Inconsistency measures:</b> | Not applicable                       |
| Incoherence judgment           | No concerns ▼                        |
| <b>Comparison</b>              | <b>Beta blockers:Sildenafil</b>      |
| <b>Evidence: indirect</b>      |                                      |
| Indirect odds ratio:           | 0.090(0.004,1.827)                   |
| <b>Inconsistency measures:</b> | Not applicable                       |
| Incoherence judgment           | No concerns ▼                        |
| <b>Comparison</b>              | <b>Beta blockers:Vericiguat 10mg</b> |
| <b>Evidence: indirect</b>      |                                      |
| Indirect odds ratio:           | 0.266(0.095,0.747)                   |
| <b>Inconsistency measures:</b> | Not applicable                       |
| Incoherence judgment           | No concerns ▼                        |

**Comparison** Beta blockers:Vericiguat 15mg  
**Evidence: indirect**  
 Indirect odds ratio: 0.410(0.137,1.224)  
**Inconsistency measures:** Not applicable  
 Incoherence judgment  ▼

**Comparison** Digoxin:MRA  
**Evidence: indirect**  
 Indirect odds ratio: 1.098(0.775,1.555)  
**Inconsistency measures:** Not applicable  
 Incoherence judgment  ▼

**Comparison** Digoxin:Sildenafil  
**Evidence: indirect**  
 Indirect odds ratio: 0.152(0.008,3.030)  
**Inconsistency measures:** Not applicable  
 Incoherence judgment  ▼

**Comparison** Digoxin:Vericiguat 10mg  
**Evidence: indirect**  
 Indirect odds ratio: 0.452(0.173,1.180)  
**Inconsistency measures:** Not applicable  
 Incoherence judgment  ▼

**Comparison** Digoxin:Vericiguat 15mg  
**Evidence: indirect**  
 Indirect odds ratio: 0.697(0.250,1.941)  
**Inconsistency measures:** Not applicable  
 Incoherence judgment  ▼

**Comparison** MRA:Sildenafil  
**Evidence: indirect**  
 Indirect odds ratio: 0.139(0.007,2.736)  
**Inconsistency measures:** Not applicable  
 Incoherence judgment  ▼

**Comparison** MRA:Vericiguat 10mg  
**Evidence: indirect**  
 Indirect odds ratio: 0.411(0.162,1.046)  
**Inconsistency measures:** Not applicable  
 Incoherence judgment  ▼

**Comparison** MRA:Vericiguat 15mg  
**Evidence: indirect**  
 Indirect odds ratio: 0.635(0.234,1.723)  
**Inconsistency measures:** Not applicable  
 Incoherence judgment  ▼

**Comparison** Sildenafil:Vericiguat 10mg  
**Evidence: indirect**

---

Indirect odds ratio: 2.964(0.132,66.620)  
**Inconsistency measures:** Not applicable

Incoherence judgment  ▼

**Comparison** Sildenafil:Vericiguat 15mg  
**Evidence: indirect**

---

Indirect odds ratio: 4.572(0.199,104.878)  
**Inconsistency measures:** Not applicable

Incoherence judgment  ▼
