# Supplementary material for: Comparison of Pharmacological Treatment Effects on Long-Time Outcomes in Heart Failure With Preserved Ejection Fraction: A Network Meta-analysis of Randomized Controlled Trials
Source: PubMed Central journal article supplement (PMC8652335; doi:10.3389/fphar.2021.707777), 2021-11-24
Supplement: DataSheet4.pdf [file DataSheet4.pdf]

# Confidence In Network Meta Analysis - CINeMA 2.0.0 - Project: HFpEF network meta-analysis

## Heterogeneity

Define clinically important size of effect: Odds ratio

Relative effect estimates below **1.000** and above **1.000** are considered clinically important.

Importance of heterogeneity depends on the variability of effects in relation to a clinically important size of effect

The estimated value of between-study variance for the network meta-analysis is **0.000**

**Comparison** ACEI:ARB

**Evidence: mixed**

NMA estimate: **0.831**

**95% intervals for NMA estimate**

Confidence interval: **(0.433,1.594)**

Prediction interval: **(0.353,1.952)**

*Confidence and prediction intervals*

**agree** in relation to clinically important effect

Heterogeneity judgment

**No concerns** ▼

**Comparison** ACEI:Placebo

**Evidence: mixed**

NMA estimate: **0.845**

**95% intervals for NMA estimate**

Confidence interval: **(0.448,1.595)**

Prediction interval: **(0.368,1.944)**

*Confidence and prediction intervals*

**agree** in relation to clinically important effect

Heterogeneity judgment

**No concerns** ▼

**Comparison** ARB:ARNI

**Evidence: mixed**

NMA estimate: **1.036**

**95% intervals for NMA estimate**

Confidence interval: **(0.882,1.217)**

Prediction interval: **(0.839,1.279)**

*Confidence and prediction intervals*

**agree** in relation to clinically important effect

Heterogeneity judgment

**No concerns** ▼

**Comparison** ARB:Placebo

**Evidence: mixed**

NMA estimate: **1.018**

**95% intervals for NMA estimate**

Confidence interval: **(0.877,1.180)**

Prediction interval: **(0.837,1.236)**

*Confidence and prediction intervals*

**agree** in relation to clinically important effect

Heterogeneity judgment

**No concerns** ▼

**Comparison Beta blockers:Placebo**  
**Evidence: mixed**

NMA estimate: **0.588**  
**95% intervals for NMA estimate**  
 Confidence interval: **(0.363,0.953)**  
 Prediction interval: **(0.312,1.108)**

*Prediction interval extends into clinically important effects in **both** directions*

Heterogeneity judgment

Major concerns ▼

**Comparison Digoxin:Placebo**  
**Evidence: mixed**

NMA estimate: **0.999**  
**95% intervals for NMA estimate**  
 Confidence interval: **(0.744,1.342)**  
 Prediction interval: **(0.679,1.471)**

*Confidence and prediction intervals **agree** in relation to clinically important effect*

Heterogeneity judgment

No concerns ▼

**Comparison MRA:Placebo**  
**Evidence: mixed**

NMA estimate: **0.910**  
**95% intervals for NMA estimate**  
 Confidence interval: **(0.756,1.096)**  
 Prediction interval: **(0.714,1.161)**

*Confidence and prediction intervals **agree** in relation to clinically important effect*

Heterogeneity judgment

No concerns ▼

**Comparison Placebo:Sildenafil**  
**Evidence: mixed**

NMA estimate: **0.153**  
**95% intervals for NMA estimate**  
 Confidence interval: **(0.008,2.989)**  
 Prediction interval: **(0.003,7.552)**

*Confidence and prediction intervals **agree** in relation to clinically important effect*

Heterogeneity judgment

No concerns ▼

**Comparison**  
**Evidence: Placebo:Vericiguat 10mg mixed**

NMA estimate: **0.452**  
**95% intervals for NMA estimate**  
 Confidence interval: **(0.181,1.127)**  
 Prediction interval: **(0.136,1.499)**

*Confidence and prediction intervals **agree** in relation to clinically important effect*

Heterogeneity judgment

No concerns ▼

**Comparison**  
**Evidence: Placebo:Vericiguat 15mg mixed**

NMA estimate: **0.697**  
**95% intervals for NMA estimate**  
 Confidence interval: **(0.261,1.860)**  
 Prediction interval: **(0.192,2.526)**

*Confidence and prediction intervals **agree** in relation to clinically important effect*

Heterogeneity judgment

No concerns ▼

**Comparison****Vericiguat 10mg:Vericiguat 15mg****Evidence: mixed**NMA estimate: **1.542****95% intervals for NMA estimate**Confidence interval: **(0.680,3.499)**Prediction interval: **(0.527,4.516)***Confidence and prediction intervals***agree** in relation to clinically important effect

Heterogeneity judgment

No concerns ▼

**Comparison****ACEI:ARNI****Evidence: indirect**NMA estimate: **0.861****95% intervals for NMA estimate**Confidence interval: **(0.440,1.684)**Prediction interval: **(0.357,2.075)***Confidence and prediction intervals***agree** in relation to clinically important effect

Heterogeneity judgment

No concerns ▼

**Comparison ACEI:Beta blockers****Evidence: indirect**NMA estimate: **1.437****95% intervals for NMA estimate**Confidence interval: **(0.647,3.193)**Prediction interval: **(0.505,4.094)***Confidence and prediction intervals***agree** in relation to clinically important effect

Heterogeneity judgment

No concerns ▼

**Comparison****ACEI:Digoxin****Evidence: indirect**NMA estimate: **0.846****95% intervals for NMA estimate**Confidence interval: **(0.420,1.703)**Prediction interval: **(0.338,2.118)***Confidence and prediction intervals***agree** in relation to clinically important effect

Heterogeneity judgment

No concerns ▼

**Comparison ACEI:MRA****Evidence: indirect**NMA estimate: **0.929****95% intervals for NMA estimate**Confidence interval: **(0.479,1.799)**Prediction interval: **(0.390,2.211)***Confidence and prediction intervals***agree** in relation to clinically important effect

Heterogeneity judgment

No concerns ▼

**Comparison****ACEI:Sildenafil****Evidence: indirect**NMA estimate: **0.129****95% intervals for NMA estimate**Confidence interval: **(0.006,2.701)**Prediction interval: **(0.002,6.969)***Confidence and prediction intervals***agree** in relation to clinically important effect

Heterogeneity judgment

No concerns ▼

**Comparison ACEI:Vericiguat 10mg**  
**Evidence: indirect**

NMA estimate: **0.382**

**95% intervals for NMA estimate**

Confidence interval: **(0.126,1.163)**

Prediction interval: **(0.089,1.645)**

*Confidence and prediction intervals*  
**agree** in relation to clinically  
 important effect

Heterogeneity judgment

No concerns ▼

**Comparison ACEI:Vericiguat 15mg**  
**Evidence: indirect**

NMA estimate: **0.589**

**95% intervals for NMA estimate**

Confidence interval: **(0.183,1.897)**

Prediction interval: **(0.127,2.730)**

*Confidence and prediction intervals*  
**agree** in relation to clinically  
 important effect

Heterogeneity judgment

No concerns ▼

**Comparison ARB:Beta blockers**  
**Evidence: indirect**

NMA estimate: **1.731**

**95% intervals for NMA estimate**

Confidence interval: **(1.044,2.869)**

Prediction interval: **(0.892,3.359)**

*Prediction interval extends into*  
*clinically important effects in **both***  
*directions*

Heterogeneity judgment

Major concerns ▼

**Comparison ARB:Digoxin**  
**Evidence: indirect**

NMA estimate: **1.018**

**95% intervals for NMA estimate**

Confidence interval: **(0.732,1.416)**

Prediction interval: **(0.661,1.570)**

*Confidence and prediction intervals*  
**agree** in relation to clinically  
 important effect

Heterogeneity judgment

No concerns ▼

**Comparison ARB:MRA**  
**Evidence: indirect**

NMA estimate: **1.118**

**95% intervals for NMA estimate**

Confidence interval: **(0.882,1.418)**

Prediction interval: **(0.819,1.527)**

*Confidence and prediction intervals*  
**agree** in relation to clinically  
 important effect

Heterogeneity judgment

No concerns ▼

**Comparison ARB:Sildenafil**  
**Evidence: indirect**

NMA estimate: **0.155**

**95% intervals for NMA estimate**

Confidence interval: **(0.008,3.052)**

Prediction interval: **(0.003,7.721)**

*Confidence and prediction intervals*  
**agree** in relation to clinically  
 important effect

Heterogeneity judgment

No concerns ▼

**Comparison ARB:Vericiguat 10mg**  
**Evidence: indirect**

NMA estimate: **0.460**

**95% intervals for NMA estimate**

Confidence interval: **(0.182,1.161)**

Prediction interval: **(0.137,1.549)**

*Confidence and prediction intervals*  
**agree** in relation to clinically  
 important effect

Heterogeneity judgment

No concerns ▼

**Comparison ARB:Vericiguat 15mg**  
**Evidence: indirect**

NMA estimate: **0.709**

**95% intervals for NMA estimate**

Confidence interval: **(0.263,1.914)**

Prediction interval: **(0.193,2.608)**

*Confidence and prediction intervals*  
**agree** in relation to clinically  
 important effect

Heterogeneity judgment

No concerns ▼

**Comparison ARNI:Beta blockers**  
**Evidence: indirect**

NMA estimate: **1.670**

**95% intervals for NMA estimate**

Confidence interval: **(0.983,2.840)**

Prediction interval: **(0.833,3.350)**

*Confidence and prediction intervals*  
**agree** in relation to clinically  
 important effect

Heterogeneity judgment

No concerns ▼

**Comparison ARNI:Digoxin**  
**Evidence: indirect**

NMA estimate: **0.983**

**95% intervals for NMA estimate**

Confidence interval: **(0.681,1.419)**

Prediction interval: **(0.607,1.591)**

*Confidence and prediction intervals*  
**agree** in relation to clinically  
 important effect

Heterogeneity judgment

No concerns ▼

**Comparison ARNI:MRA**  
**Evidence: indirect**

NMA estimate: **1.079**

**95% intervals for NMA estimate**

Confidence interval: **(0.810,1.438)**

Prediction interval: **(0.741,1.572)**

*Confidence and prediction intervals*  
**agree** in relation to clinically  
 important effect

Heterogeneity judgment

No concerns ▼

**Comparison ARNI:Placebo**  
**Evidence: indirect**

NMA estimate: **0.982**

**95% intervals for NMA estimate**

Confidence interval: **(0.789,1.223)**

Prediction interval: **(0.737,1.309)**

*Confidence and prediction intervals*  
**agree** in relation to clinically  
 important effect

Heterogeneity judgment

No concerns ▼

**Comparison ARNI:Sildenafil**  
**Evidence: indirect**

NMA estimate: **0.150**

**95% intervals for NMA estimate**

Confidence interval: **(0.008,2.959)**

Prediction interval: **(0.003,7.495)**

*Confidence and prediction intervals*  
**agree** in relation to clinically  
 important effect

Heterogeneity judgment

No concerns ▼

**Comparison ARNI:Vericiguat 10mg**  
**Evidence: indirect**

NMA estimate: **0.444**

**95% intervals for NMA estimate**

Confidence interval: **(0.173,1.136)**

Prediction interval: **(0.129,1.523)**

*Confidence and prediction intervals*  
**agree** in relation to clinically  
 important effect

Heterogeneity judgment

No concerns ▼

**Comparison ARNI:Vericiguat 15mg**  
**Evidence: indirect**

NMA estimate: **0.685**

**95% intervals for NMA estimate**

Confidence interval: **(0.251,1.872)**

Prediction interval: **(0.183,2.560)**

*Confidence and prediction intervals*  
**agree** in relation to clinically  
 important effect

Heterogeneity judgment

No concerns ▼

**Comparison Beta blockers:Digoxin**  
**Evidence: indirect**

NMA estimate: **0.588**

**95% intervals for NMA estimate**

Confidence interval: **(0.334,1.036)**

Prediction interval: **(0.280,1.236)**

*Confidence and prediction intervals*  
**agree** in relation to clinically  
 important effect

Heterogeneity judgment

No concerns ▼

**Comparison Beta blockers:MRA**  
**Evidence: indirect**

NMA estimate: **0.646**

**95% intervals for NMA estimate**

Confidence interval: **(0.385,1.084)**

Prediction interval: **(0.328,1.274)**

*Confidence and prediction intervals*  
**agree** in relation to clinically  
 important effect

Heterogeneity judgment

No concerns ▼

**Comparison**  
**Evidence: Beta blockers:Sildenafil**  
**indirect**

NMA estimate: **0.090**

**95% intervals for NMA estimate**

Confidence interval: **(0.004,1.827)**

Prediction interval: **(0.002,4.673)**

*Confidence and prediction intervals*  
**agree** in relation to clinically  
 important effect

Heterogeneity judgment

No concerns ▼

**Comparison****Beta blockers:Vericiguat 10mg****Evidence: indirect**NMA estimate: **0.266****95% intervals for NMA estimate**Confidence interval: **(0.095,0.747)**Prediction interval: **(0.068,1.031)***Prediction interval extends into clinically important effects in **both** directions*

Heterogeneity judgment

Major concerns ▼

**Comparison****Beta blockers:Vericiguat 15mg****Evidence: indirect**NMA estimate: **0.410****95% intervals for NMA estimate**Confidence interval: **(0.137,1.224)**Prediction interval: **(0.098,1.721)***Confidence and prediction intervals **agree** in relation to clinically important effect*

Heterogeneity judgment

No concerns ▼

**Comparison****Digoxin:MRA****Evidence: indirect**NMA estimate: **1.098****95% intervals for NMA estimate**Confidence interval: **(0.775,1.555)**Prediction interval: **(0.695,1.733)***Confidence and prediction intervals **agree** in relation to clinically important effect*

Heterogeneity judgment

No concerns ▼

**Comparison****Digoxin:Sildenafil****Evidence: indirect**NMA estimate: **0.152****95% intervals for NMA estimate**Confidence interval: **(0.008,3.030)**Prediction interval: **(0.003,7.691)***Confidence and prediction intervals **agree** in relation to clinically important effect*

Heterogeneity judgment

No concerns ▼

**Comparison****Evidence: Digoxin:Vericiguat 10mg indirect**NMA estimate: **0.452****95% intervals for NMA estimate**Confidence interval: **(0.173,1.180)**Prediction interval: **(0.128,1.592)***Confidence and prediction intervals **agree** in relation to clinically important effect*

Heterogeneity judgment

No concerns ▼

**Comparison****Evidence: Digoxin:Vericiguat 15mg indirect**NMA estimate: **0.697****95% intervals for NMA estimate**Confidence interval: **(0.250,1.941)**Prediction interval: **(0.182,2.671)***Confidence and prediction intervals **agree** in relation to clinically important effect*

Heterogeneity judgment

No concerns ▼

**Comparison** MRA:Sildenafil  
**Evidence: indirect**

NMA estimate: 0.139  
**95% intervals for NMA estimate**  
 Confidence interval: (0.007,2.736)  
 Prediction interval: (0.003,6.925)

*Confidence and prediction intervals  
**agree** in relation to clinically  
 important effect*

Heterogeneity judgment

No concerns ▼

**Comparison** MRA:Vericiguat 10mg  
**Evidence: indirect**

NMA estimate: 0.411  
**95% intervals for NMA estimate**  
 Confidence interval: (0.162,1.046)  
 Prediction interval: (0.121,1.398)

*Confidence and prediction intervals  
**agree** in relation to clinically  
 important effect*

Heterogeneity judgment

No concerns ▼

**Comparison** MRA:Vericiguat 15mg  
**Evidence: indirect**

NMA estimate: 0.635  
**95% intervals for NMA estimate**  
 Confidence interval: (0.234,1.723)  
 Prediction interval: (0.171,2.352)

*Confidence and prediction intervals  
**agree** in relation to clinically  
 important effect*

Heterogeneity judgment

No concerns ▼

**Comparison** Sildenafil:Vericiguat 10mg  
**Evidence: indirect**

NMA estimate: 2.964  
**95% intervals for NMA estimate**  
 Confidence interval: (0.132,66.620)  
 Prediction interval: (0.050,175.686)

*Confidence and prediction intervals  
**agree** in relation to clinically  
 important effect*

Heterogeneity judgment

No concerns ▼

**Comparison** Sildenafil:Vericiguat 15mg  
**Evidence: indirect**

NMA estimate: 4.572  
**95% intervals for NMA estimate**  
 Confidence interval: (0.199,104.878)  
 Prediction interval: (0.075,278.356)

*Confidence and prediction intervals  
**agree** in relation to clinically  
 important effect*

Heterogeneity judgment

No concerns ▼
