# Supplementary material for: Comparison of Pharmacological Treatment Effects on Long-Time Outcomes in Heart Failure With Preserved Ejection Fraction: A Network Meta-analysis of Randomized Controlled Trials
Source: PubMed Central journal article supplement (PMC8652335; doi:10.3389/fphar.2021.707777), 2021-11-24
Supplement: DataSheet5.pdf [file DataSheet5.pdf]

# Confidence In Network Meta Analysis - CINeMA 2.0.0 - Project: HFpEF network meta-analysis

## HFpEF network meta-analysis

| Comparison                         | Number of Studies | Within-study bias | Reporting bias | Indirectness                           | Imprecision                             | Heterogeneity                           | Incoherence | Confidence rating                         | Reason(s) for downgrading |
|------------------------------------|-------------------|-------------------|----------------|----------------------------------------|-----------------------------------------|-----------------------------------------|-------------|-------------------------------------------|---------------------------|
| Mixed evidence                     |                   |                   |                |                                        |                                         |                                         |             |                                           |                           |
| ACEI vs ARB                        | 1                 | --                | --             | No concerns                            | Major concerns <input type="checkbox"/> | No concerns                             | No concerns | Low <input type="button" value="v"/>      |                           |
| ACEI vs Placebo                    | 3                 | --                | --             | No concerns                            | Major concerns <input type="checkbox"/> | No concerns                             | No concerns | Low <input type="button" value="v"/>      |                           |
| ARB vs ARNI                        | 2                 | --                | --             | Some concerns <input type="checkbox"/> | Major concerns <input type="checkbox"/> | No concerns                             | No concerns | Low <input type="button" value="v"/>      |                           |
| ARB vs Placebo                     | 2                 | --                | --             | No concerns                            | Major concerns <input type="checkbox"/> | No concerns                             | No concerns | Low <input type="button" value="v"/>      |                           |
| Beta blockers vs Placebo           | 2                 | --                | --             | No concerns                            | No concerns                             | Major concerns <input type="checkbox"/> | No concerns | Low <input type="button" value="v"/>      |                           |
| Digoxin vs Placebo                 | 1                 | --                | --             | No concerns                            | Major concerns <input type="checkbox"/> | No concerns                             | No concerns | Low <input type="button" value="v"/>      |                           |
| MRA vs Placebo                     | 2                 | --                | --             | No concerns                            | Major concerns <input type="checkbox"/> | No concerns                             | No concerns | Low <input type="button" value="v"/>      |                           |
| Placebo vs Sildenafil              | 1                 | --                | --             | No concerns                            | Major concerns <input type="checkbox"/> | No concerns                             | No concerns | Low <input type="button" value="v"/>      |                           |
| Placebo vs Vericiguat 10mg         | 1                 | --                | --             | No concerns                            | Major concerns <input type="checkbox"/> | No concerns                             | No concerns | Low <input type="button" value="v"/>      |                           |
| Placebo vs Vericiguat 15mg         | 1                 | --                | --             | No concerns                            | Major concerns <input type="checkbox"/> | No concerns                             | No concerns | Low <input type="button" value="v"/>      |                           |
| Vericiguat 10mg vs Vericiguat 15mg | 1                 | --                | --             | No concerns                            | Major concerns <input type="checkbox"/> | No concerns                             | No concerns | Moderate <input type="button" value="v"/> |                           |
| Indirect evidence                  |                   |                   |                |                                        |                                         |                                         |             |                                           |                           |
| ACEI vs ARNI                       | --                | --                | --             | No concerns                            | Major concerns <input type="checkbox"/> | No concerns                             | No concerns | Low <input type="button" value="v"/>      |                           |
| ACEI vs Beta blockers              | --                | --                | --             | No concerns                            | Major concerns <input type="checkbox"/> | No concerns                             | No concerns | Moderate <input type="button" value="v"/> |                           |
| ACEI vs Digoxin                    | --                | --                | --             | No concerns                            | Major concerns <input type="checkbox"/> | No concerns                             | No concerns | Moderate <input type="button" value="v"/> |                           |
| ACEI vs MRA                        | --                | --                | --             | No concerns                            | Major concerns <input type="checkbox"/> | No concerns                             | No concerns | Moderate <input type="button" value="v"/> |                           |
| ACEI vs Sildenafil                 | --                | --                | --             | No concerns                            | Major concerns <input type="checkbox"/> | No concerns                             | No concerns | Moderate <input type="button" value="v"/> |                           |

| Comparison                  | Number of Studies | Within-study bias | Reporting bias | Indirectness | Imprecision                             | Heterogeneity                           | Incoherence | Confidence rating | Reason(s) for downgrading |
|-----------------------------|-------------------|-------------------|----------------|--------------|-----------------------------------------|-----------------------------------------|-------------|-------------------|---------------------------|
| ACEI vs Vericiguat 10mg     | --                | --                | --             | No concerns  | Major concerns <input type="checkbox"/> | No concerns                             | No concerns | Moderate ▼        |                           |
| ACEI vs Vericiguat 15mg     | --                | --                | --             | No concerns  | Major concerns <input type="checkbox"/> | No concerns                             | No concerns | Moderate ▼        |                           |
| ARB vs Beta blockers        | --                | --                | --             | No concerns  | No concerns                             | Major concerns <input type="checkbox"/> | No concerns | Moderate ▼        |                           |
| ARB vs Digoxin              | --                | --                | --             | No concerns  | Major concerns <input type="checkbox"/> | No concerns                             | No concerns | Moderate ▼        |                           |
| ARB vs MRA                  | --                | --                | --             | No concerns  | Major concerns <input type="checkbox"/> | No concerns                             | No concerns | Moderate ▼        |                           |
| ARB vs Sildenafil           | --                | --                | --             | No concerns  | Major concerns <input type="checkbox"/> | No concerns                             | No concerns | Moderate ▼        |                           |
| ARB vs Vericiguat 10mg      | --                | --                | --             | No concerns  | Major concerns <input type="checkbox"/> | No concerns                             | No concerns | Moderate ▼        |                           |
| ARB vs Vericiguat 15mg      | --                | --                | --             | No concerns  | Major concerns <input type="checkbox"/> | No concerns                             | No concerns | Moderate ▼        |                           |
| ARNI vs Beta blockers       | --                | --                | --             | No concerns  | Major concerns <input type="checkbox"/> | No concerns                             | No concerns | Moderate ▼        |                           |
| ARNI vs Digoxin             | --                | --                | --             | No concerns  | Major concerns <input type="checkbox"/> | No concerns                             | No concerns | Moderate ▼        |                           |
| ARNI vs MRA                 | --                | --                | --             | No concerns  | Major concerns <input type="checkbox"/> | No concerns                             | No concerns | Moderate ▼        |                           |
| ARNI vs Placebo             | --                | --                | --             | No concerns  | Major concerns <input type="checkbox"/> | No concerns                             | No concerns | Moderate ▼        |                           |
| ARNI vs Sildenafil          | --                | --                | --             | No concerns  | Major concerns <input type="checkbox"/> | No concerns                             | No concerns | Moderate ▼        |                           |
| ARNI vs Vericiguat 10mg     | --                | --                | --             | No concerns  | Major concerns <input type="checkbox"/> | No concerns                             | No concerns | Moderate ▼        |                           |
| ARNI vs Vericiguat 15mg     | --                | --                | --             | No concerns  | Major concerns <input type="checkbox"/> | No concerns                             | No concerns | Moderate ▼        |                           |
| Beta blockers vs Digoxin    | --                | --                | --             | No concerns  | Major concerns <input type="checkbox"/> | No concerns                             | No concerns | Moderate ▼        |                           |
| Beta blockers vs MRA        | --                | --                | --             | No concerns  | Major concerns <input type="checkbox"/> | No concerns                             | No concerns | Moderate ▼        |                           |
| Beta blockers vs Sildenafil | --                | --                | --             | No concerns  | Major concerns <input type="checkbox"/> | No concerns                             | No concerns | High ▼            |                           |

| Comparison                       | Number of Studies | Within-study bias | Reporting bias | Indirectness | Imprecision                             | Heterogeneity                           | Incoherence | Confidence rating | Reason(s) for downgrading |
|----------------------------------|-------------------|-------------------|----------------|--------------|-----------------------------------------|-----------------------------------------|-------------|-------------------|---------------------------|
| Beta blockers vs Vericiguat 10mg | --                | --                | --             | No concerns  | No concerns                             | Major concerns <input type="checkbox"/> | No concerns | Moderate ▼        |                           |
| Beta blockers vs Vericiguat 15mg | --                | --                | --             | No concerns  | Major concerns <input type="checkbox"/> | No concerns                             | No concerns | Moderate ▼        |                           |
| Digoxin vs MRA                   | --                | --                | --             | No concerns  | Major concerns <input type="checkbox"/> | No concerns                             | No concerns | Moderate ▼        |                           |
| Digoxin vs Sildenafil            | --                | --                | --             | No concerns  | Major concerns <input type="checkbox"/> | No concerns                             | No concerns | Moderate ▼        |                           |
| Digoxin vs Vericiguat 10mg       | --                | --                | --             | No concerns  | Major concerns <input type="checkbox"/> | No concerns                             | No concerns | Moderate ▼        |                           |
| Digoxin vs Vericiguat 15mg       | --                | --                | --             | No concerns  | Major concerns <input type="checkbox"/> | No concerns                             | No concerns | Moderate ▼        |                           |
| MRA vs Sildenafil                | --                | --                | --             | No concerns  | Major concerns <input type="checkbox"/> | No concerns                             | No concerns | Moderate ▼        |                           |
| MRA vs Vericiguat 10mg           | --                | --                | --             | No concerns  | Major concerns <input type="checkbox"/> | No concerns                             | No concerns | Moderate ▼        |                           |
| MRA vs Vericiguat 15mg           | --                | --                | --             | No concerns  | Major concerns <input type="checkbox"/> | No concerns                             | No concerns | Moderate ▼        |                           |
| Sildenafil vs Vericiguat 10mg    | --                | --                | --             | No concerns  | Major concerns <input type="checkbox"/> | No concerns                             | No concerns | Moderate ▼        |                           |
| Sildenafil vs Vericiguat 15mg    | --                | --                | --             | No concerns  | Major concerns <input type="checkbox"/> | No concerns                             | No concerns | Moderate ▼        |                           |
